# Supplementary material
Source: PubMed Central journal article supplement (PMC5584549)
Supplement: NIHMS899174-supplement-Supplemental_Material.pdf [file NIHMS899174-supplement-Supplemental_Material.pdf]

## Supplementary Appendix

This appendix has been provided by the authors to give readers additional information about their work.

Supplement to: Swain SM, Baselga J, Kim S-B, et al. Pertuzumab, trastuzumab, and docetaxel in HER2-positive metastatic breast cancer. *N Engl J Med* 2015;372:724-34. DOI: 10.1056/NEJMoa1413513

## **Contents**

|                                  |        |
|----------------------------------|--------|
| Collaborators                    | page 2 |
| Legend to Supplementary Figure 1 | page 3 |
| Supplementary Figure 1           | page 4 |
| Supplementary Table 1            | page 6 |

*The following investigators also participated in the CLEOPATRA study:*

*Argentina* – M.A. Bártoli, M.I. Bianconi, M. Kotliar, J.A. Lacava, M. Matwiejuk, P.E. Price, M. Varela; *Brazil* – J. Andrade, R. Araujo, S. Azevedo, E. Cortes, E. Costa e Silva, D. Cubero, G. Delgado, M. del P. Diz, B. Eyll, F. Franke, R. Hegg, G. Ismael, D. Jendiroba, J.L. Pedrini, R. Pereira, H. Pinczowski, P. Tokunaga, C. Tosello; *Canada* – C. Brezden-Masley; *China* – Ying Cheng, Xuenong Ouyang, Zhenzhou Shen, Xiaojia Wang, Liwei Wang, Tsz Kok Yau, W. Yeo; *Costa Rica* – D. Otero; *Croatia* – Z. Soldic, D. Vrbanec; *Ecuador* – T. Soria; *Finland* – P. Kellokumpu-Lehtinen, S. Pyrhönen; *France* – M. Campone, B. Coudert, J.M. Ferrero, F. Priou; *Germany* – B. Aktas, W. Aulitzky, M. Clemens, E.-M. Grischke, M. Hauschild, M. Just, A. Kirsch, S. Kuemmel, C. Maintz, A. Marmé, V. Mueller, M. Schmidt, A. Schneeweiss, C. Schumacher, C. Thomssen, B. Wesenberg; *Guatemala* – H. Castro-Salguero, C. Hernandez Monroy, L.M. Zelina-Toache; *Italy* – D. Amadori, C. Angiolini, L. Biganzoli, S. Cinieri, T. Gamucci, S. Iacobelli, L. Latini, F. Montemurro, E. Simoncini; *Japan* – K. Aogi, H. Fuji, J. Horiguchi, K. Inoue, Y. Ito, H. Iwata, M. Kashiwaba, N. Kohno, K. Kuroi, N. Masuda, K. Nakagami, T. Nakayama, R. Nishimura, S. Saji, Y. Sasaki, N. Sato, K. Takeda, Y. Tokuda, K. Tsugawa, T. Ueno, J. Watanabe, R. Yoshiaki; *Korea* – Seock-Ah Im, Young-Hyuck Im, Sung Bae Kim, Yong Wha Moon, Jung Sil Ro, Joo Hyuk Sohn; *Latvia* – E. Grincuka, I. Kudaba, G. Purkalne; *Macedonia* – L. Kostovska-Maneva, P. Stefanovski; *Mexico* – G. Martinez, G. Tellez; *Philippines* – P. Caguioa, V. Chan, D. Tudit; *Poland* – M. Foszczynska-Kloda, T. Pienkowski, W. Polkowski, E. Starowslawska, P. Tomczak; *Russian Federation* – V. Gorbunova, E. Gotovkin, I. Kiselev, M. Kopp, M. Lichinitser, V. Merkulov, L. Roman, V. Semiglazov, V. Shirinkin; *Singapore* – Soo Chin Lee, Zee Wan Wong; *Spain* – E. Alba Conejo, J. Baselga, N. Batista, L. Calvo, E. Ciruelos, J. Cortés, M. Gil i Gil, A. Gonzalez, J. Hornedo Muguero, S. Morales, N. Ribelles Entrena, S. De la C. Sánchez, P. Sanchez Rovira; *Thailand* – W. Arpornwirat, T. Dejthevaporn, J. Maneechavakajorn, V. Srimuninnimit, V. Sriuranpong, P. Sunpaweravong; *UK* – R. Ahmad, L. Assersohn, I. Boiangiu, N. Davidson, C. Gallagher, A. Jones, D. Miles, S. O'Reilly, A. Robinson, D. Wheatley; *USA* – R. Agajanian, J.F. Armor, M.W. Audeh, A.S. Behairy, R. Birhiray, R. Blachly, K. Blackwell, R. Blanchard, P. Blanchet, B.J. Bowers, A. Brufsky, L. Budde, R.R. Carroll, V. Charu, S. Dakhil, B. Daniel, J.A. Ellerton, L. Fehrenbacher, P. Flynn, S. Franco, N. Green, V. Hansen, J. Hargis, C. Hendricks, R.C. Hermann, A. Kallab, M. Karwal, G. Kato, P. Kaufman, P.S. Kennedy, P. Klein, E.P. Lester, C.F. Lobo, R.A. Michaelson, J.A. Neidhart, J.D. Neidhart, A.D. Nguyen, T. O'Rourke, R. Patel, T. Patel, A. Perez, R.G. Quackenbush, C.E. Peterson, J.D. Polikoff, S.J. Prill, R. Robles, G. Rodriguez, F. Senecal, P. Sharma, R. Smith, D. Spicer, S.A. Swain, J.A. Taguchi, C.L. Vogel, D.M. Waterhouse, S. Yadav, D.A. Yardley.

*From Baselga et al. Pertuzumab plus trastuzumab plus docetaxel for metastatic breast cancer. N Engl J Med 366:109-19. Copyright © (2012) Massachusetts Medical Society.*

*Reprinted with permission*

**Supplementary Figure S1. Overall Survival Sensitivity Analyses.**

Panel A shows Kaplan–Meier estimates of overall survival when crossover patients were censored, stratified according to prior treatment and region. The median overall survival was longer by 16.9 months in the pertuzumab group (pertuzumab, trastuzumab, and docetaxel) than in the control group (placebo, trastuzumab, and docetaxel). Panel B shows Kaplan–Meier estimates of overall survival when crossover patients were excluded, stratified according to prior treatment and region. The median overall survival was longer by 21.8 months in the pertuzumab group (pertuzumab, trastuzumab, and docetaxel) than in the control group (placebo, trastuzumab, and docetaxel). The tick marks indicate censoring events. CI denotes confidence interval.

A

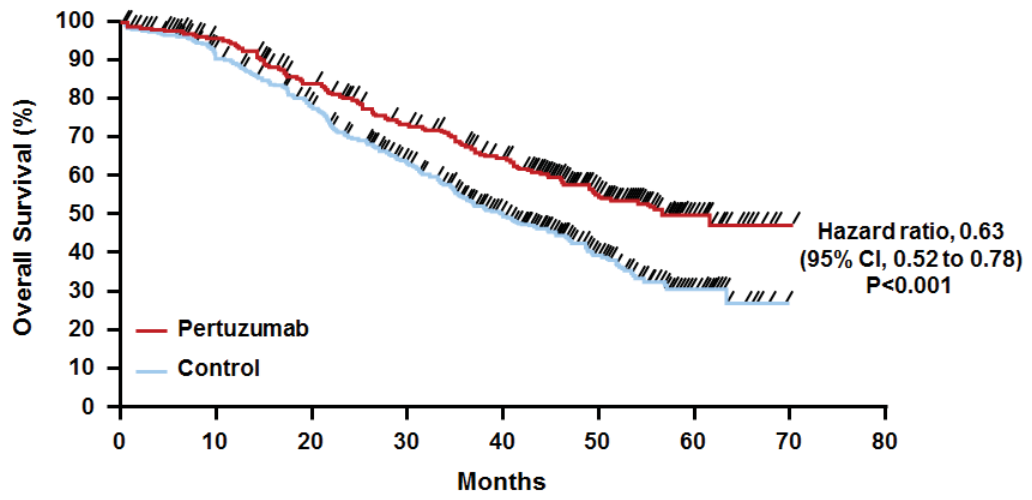

| No. at risk | 0   | 10  | 20  | 30  | 40  | 50  | 60 | 70 | 80 |
|-------------|-----|-----|-----|-----|-----|-----|----|----|----|
| Pertuzumab  | 402 | 371 | 318 | 268 | 226 | 104 | 28 | 1  | 0  |
| Control     | 406 | 350 | 289 | 217 | 145 | 65  | 17 | 0  | 0  |

B

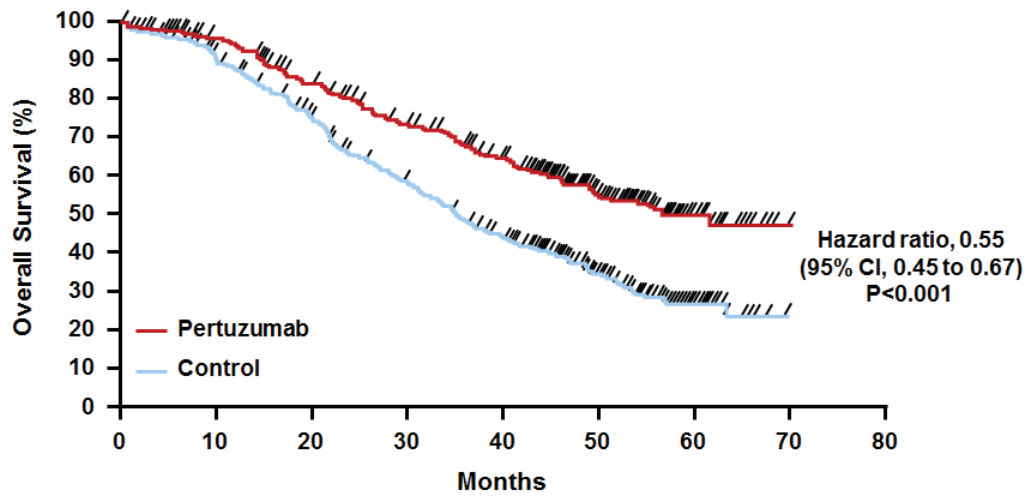

| No. at risk | 0   | 10  | 20  | 30  | 40  | 50  | 60 | 70 | 80 |
|-------------|-----|-----|-----|-----|-----|-----|----|----|----|
| Pertuzumab  | 402 | 371 | 318 | 268 | 226 | 104 | 28 | 1  | 0  |
| Control     | 358 | 302 | 241 | 182 | 133 | 65  | 17 | 0  | 0  |

**Table S1. Adverse Events in the Safety Population.\***

| Adverse Event                                            | Pertuzumab,<br>trastuzumab,<br>and docetaxel | Placebo, trastuzumab,<br>and docetaxel |
|----------------------------------------------------------|----------------------------------------------|----------------------------------------|
|                                                          | <i>Number (percent)</i>                      |                                        |
| <b>Most common events, all grades†</b>                   | <b>(n = 408)</b>                             | <b>(n = 396)</b>                       |
| Alopecia                                                 | 248 (60.8)                                   | 240 (60.6)                             |
| Diarrhea                                                 | 279 (68.4)                                   | 193 (48.7)                             |
| Neutropenia                                              | 218 (53.4)                                   | 198 (50.0)                             |
| Nausea                                                   | 183 (44.9)                                   | 168 (42.4)                             |
| Fatigue                                                  | 155 (38.0)                                   | 148 (37.4)                             |
| Rash                                                     | 153 (37.5)                                   | 95 (24.0)                              |
| Asthenia                                                 | 113 (27.7)                                   | 122 (30.8)                             |
| Decreased appetite                                       | 121 (29.7)                                   | 106 (26.8)                             |
| Peripheral edema                                         | 98 (24.0)                                    | 111 (28.0)                             |
| Vomiting                                                 | 106 (26.0)                                   | 97 (24.5)                              |
| Myalgia                                                  | 99 (24.3)                                    | 99 (25.0)                              |
| Mucosal inflammation                                     | 111 (27.2)                                   | 79 (19.9)                              |
| Headache                                                 | 105 (25.7)                                   | 76 (19.2)                              |
| Constipation                                             | 65 (15.9)                                    | 101 (25.5)                             |
| Upper respiratory tract infection                        | 85 (20.8)                                    | 57 (14.4)                              |
| Pruritus                                                 | 72 (17.6)                                    | 40 (10.1)                              |
| Febrile neutropenia                                      | 56 (13.7)                                    | 30 (7.6)                               |
| Dry skin                                                 | 46 (11.3)                                    | 24 (6.1)                               |
| Muscle spasms                                            | 42 (10.3)                                    | 20 (5.1)                               |
| <b>Most common events<br/>post-docetaxel, all grades</b> | <b>n = 306</b>                               | <b>n = 261</b>                         |

|                                   |                |                |
|-----------------------------------|----------------|----------------|
| Alopecia                          | 5 (1.6)        | 6 (2.3)        |
| Diarrhea                          | 86 (28.1)      | 37 (14.2)      |
| Neutropenia                       | 10 (3.3)       | 13 (5.0)       |
| Nausea                            | 39 (12.7)      | 30 (11.5)      |
| Fatigue                           | 41 (13.4)      | 25 (9.6)       |
| Rash                              | 56 (18.3)      | 21 (8.0)       |
| Asthenia                          | 41 (13.4)      | 23 (8.8)       |
| Decreased appetite                | 22 (7.2)       | 14 (5.4)       |
| Peripheral edema                  | 28 (9.2)       | 32 (12.3)      |
| Vomiting                          | 30 (9.8)       | 17 (6.5)       |
| Myalgia                           | 25 (8.2)       | 19 (7.3)       |
| Mucosal inflammation              | 11 (3.6)       | 4 (1.5)        |
| Headache                          | 52 (17.0)      | 32 (12.3)      |
| Constipation                      | 17 (5.6)       | 18 (6.9)       |
| Upper respiratory tract infection | 56 (18.3)      | 32 (12.3)      |
| Pruritus                          | 42 (13.7)      | 15 (5.7)       |
| Febrile neutropenia               | 0              | 0              |
| Dry skin                          | 10 (3.3)       | 10 (3.8)       |
| Muscle spasms                     | 24 (7.8)       | 6 (2.3)        |
| <b>Grade 3 or higher events‡</b>  | <b>n = 408</b> | <b>n = 396</b> |
| Neutropenia                       | 200 (49.0)     | 183 (46.2)     |
| Leukopenia                        | 50 (12.3)      | 59 (14.9)      |
| Febrile neutropenia               | 56 (13.7)      | 30 (7.6)       |
| Diarrhea                          | 38 (9.3)       | 20 (5.1)       |
| Anemia                            | 10 (2.5)       | 14 (3.5)       |
| Fatigue                           | 9 (2.2)        | 13 (3.3)       |
| Left ventricular dysfunction      | 6 (1.5)        | 13 (3.3)       |



|                          |                |                |
|--------------------------|----------------|----------------|
| Asthenia                 | 11 (2.7)       | 7 (1.8)        |
| Peripheral neuropathy    | 11 (2.7)       | 7 (1.8)        |
| Granulocytopenia         | 6 (1.5)        | 9 (2.3)        |
| Dyspnea                  | 4 (1.0)        | 8 (2.0)        |
| Hypertension             | 8 (2.0)        | 7 (1.8)        |
| Pneumonia                | 4 (1.0)        | 8 (2.0)        |
| <b>Serious events†‡§</b> | <b>n = 408</b> | <b>n = 396</b> |
| Febrile neutropenia      | 46 (11.3)      | 20 (5.1)       |
| Neutropenia              | 18 (4.4)       | 19 (4.8)       |
| Pneumonia                | 5 (1.2)        | 9 (2.3)        |
| Cellulitis               | 10 (2.5)       | 2 (0.5)        |
| Diarrhea                 | 13 (3.2)       | 5 (1.3)        |

\* All patients who received at least one dose of study drug.

† Frequency of 25% or higher or at least a 5% difference between treatment groups.

‡ Frequency of 2% or higher.

§ According to International Conference on Harmonisation Guidelines for Clinical Safety

Data Management: Definitions and Standards for Expedited Reporting, Topic E2.
